# Supplementary material
Source: publisher site journal article supplement (http://www.degruyter.com/publication/journal_key/AMMIN/downloadAsset/AMMIN_Flyer_American_Mineralogist.pdf)
Supplement: Supplementary file 1 [file AMMIN_Flyer_American_Mineralogist.pdf]

New at De Gruyter

# AMERICAN MINERALOGIST

An International Journal of Earth and Planetary Materials

Edited by Keith Putirka, Ian Swainson

*American Mineralogist: An International Journal of Earth and Planetary Materials* (Am Min), is the flagship journal of the Mineralogical Society of America (MSA), continuously published since 1916. Am Min is home to some of the most important advances in the Earth Sciences. Our mission is a continuance of this heritage: to provide readers with reports on original scientific research, both fundamental and applied, with far reaching implications and far ranging appeal. Topics of interest cover all aspects of planetary evolution, and biological and atmospheric processes mediated by solid-state phenomena. These include, but are not limited to, mineralogy and crystallography, high- and low-temperature geochemistry, petrology, geofluids, biogeochemistry, bio-mineralogy, synthetic materials of relevance to the Earth and planetary sciences, and breakthroughs in analytical methods of any of the aforementioned.

**Keith D. Putirka**, California State University, Fresno, CA; **Ian Swainson**, National Research Council of Canada, Ontario.

## Special Editors

**Kimberley T. Tait**, New Mineral Names Editor; **Ross John Angel**, **Hannes Kruger**, and **Biljana Lazic**, Technical Editors Crystal Structures, **John C. Schumacher**, Book Review Editor.

## Managing Editor

**Rachel A. Russell**, Chantilly, VA, USA.

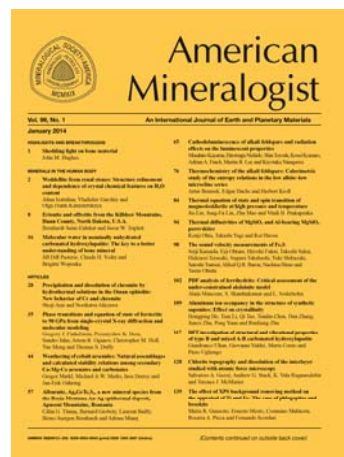

## SUBSCRIPTION RATES FOR VOLUME 99 (2014)

### Print

€ 662.00 / \*US\$ 900.00

### Online

Libraries/Institutions € 662.00 / \*US\$ 900.00

### Print + Online

€ 800.00 / \*US\$ 1,080.00

### Single issue (Print)

€ 91.00 / \*US\$ 124.00

12 issues per year

ISSN 0003-004X

e-ISSN 1945-3027

## LANGUAGE OF PUBLICATION English

**SUBJECTS** Crystal chemistry, geochemistry, biomineralization, mineral physics, crystallography, crystal structure, Martian rock and soil, Raman spectroscopy, petrology, planetary materials, Infrared spectroscopy

**OF INTEREST TO** Academics, Institutes, Libraries

**IMPACT FACTOR 2013** 2.059

**5-year IMPACT FACTOR** 2.449

Rank 8 out of 27 in category Mineralogy and 33 out of 79 in category Geochemistry & Geophysics in the 2012 Thomson Reuters Journal Citation Report/Science Edition

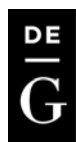

DE GRUYTER

Genthiner Straße 13 · 10785 Berlin, Germany

T +49 (0)30.260 05-0 · F +49 (0)30.260 05-251 · info@degruyter.com · www.degruyter.com

\*For orders placed in North America.

Prices are subject to change.

Prices do not include postage and handling. 08/14
